# Supplementary material for: The Role of PTEN Loss in Immune Escape, Melanoma Prognosis and Therapy Response
Source: PubMed Central journal article supplement (PMC7140048; doi:10.3390/cancers12030742), 2020-03-21
Supplement: cancers-12-00742-s001.pdf [file cancers-12-00742-s001.pdf]

## Supplementary Materials: The Role of PTEN Loss in Immune Escape, Melanoma Prognosis and Therapy Response

Rita Cabrita, Shamik Mitra, Adriana Sanna, Henrik Ekedahl, Kristina Lövgren, Håkan Olsson, Christian Ingvar, Karolin Isaksson, Martin Lauss, Ana Carneiro and Göran Jönsson

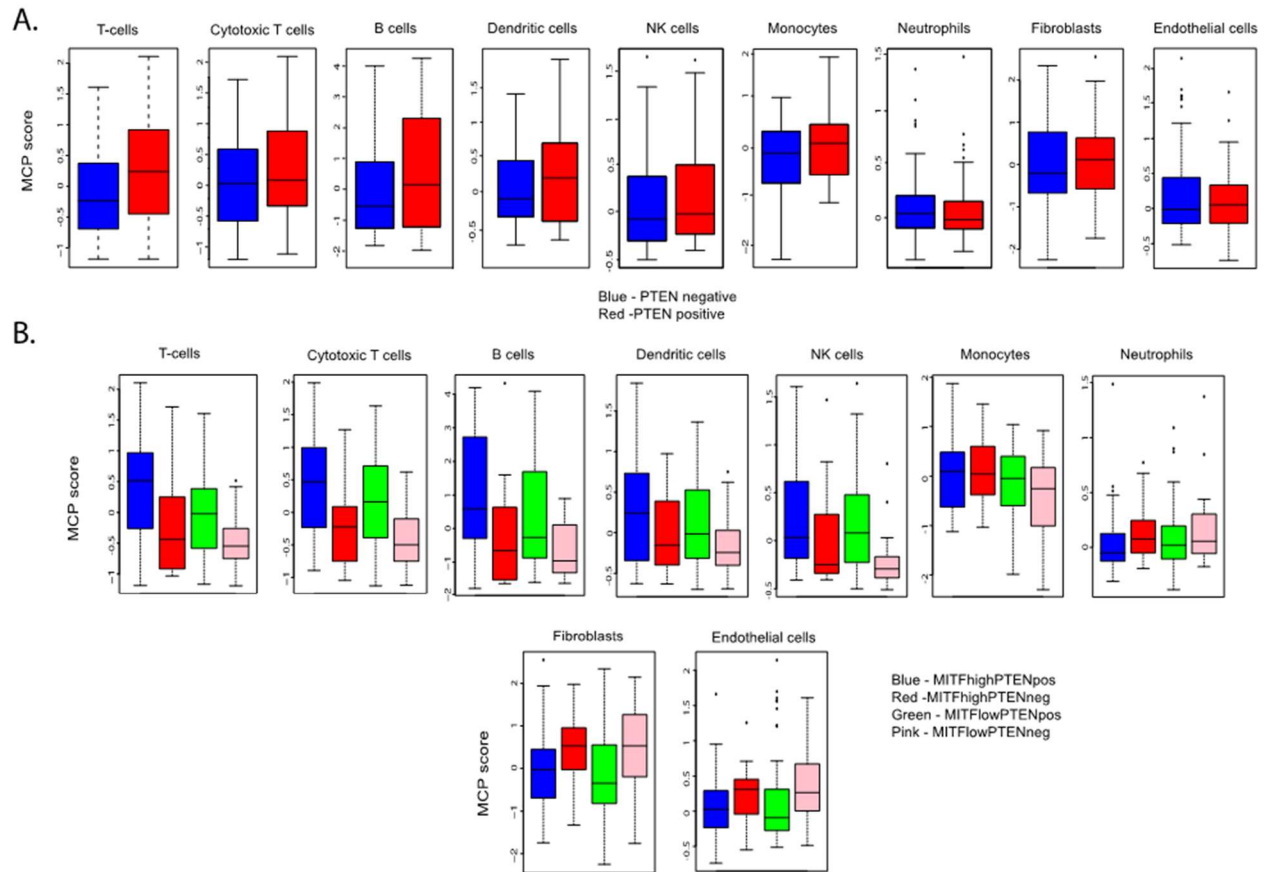

**Figure S1.** MCP immune scores in melanoma tumors. (A) MCP scores in PTEN negative (blue) and PTEN positive (red) tumors. (B) MCP scores in groups based on PTEN and MITF protein.

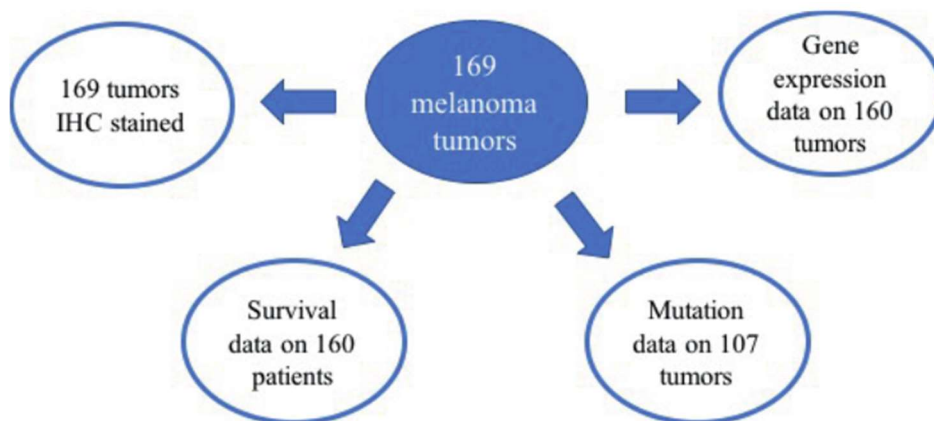

**Figure S2.** Flowchart of different data levels included in the study.

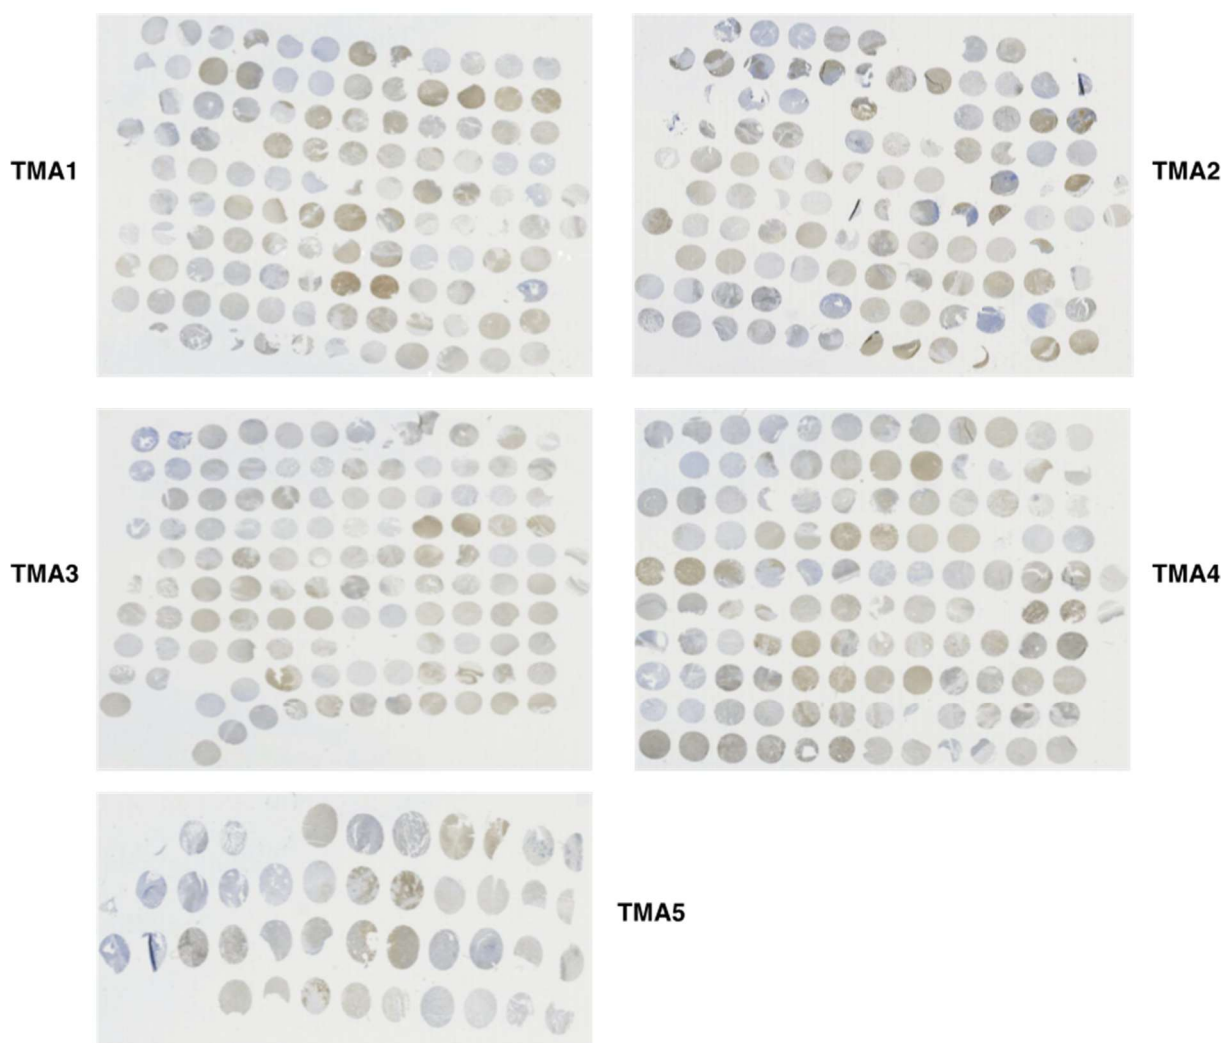

**Figure S3.** PTEN staining in the five tissue microarray (TMA) blocks.

**Table S1.** Multivariate cox regression model analysis of MITF/PTEN groupings adjusted for stage of disease, with hazard ratios and confidence intervals.

| Group                                    | HR (CI)            | <i>p</i> -Value |
|------------------------------------------|--------------------|-----------------|
| MITF/PTEN                                |                    |                 |
| MITF <sup>high</sup> PTEN <sup>pos</sup> | 1                  | -               |
| MITF <sup>high</sup> PTEN <sup>neg</sup> | 0.96 (0.56, 1.66)  | 0.89            |
| MITF <sup>low</sup> PTEN <sup>pos</sup>  | 0.90 (0.34, 2.41)  | 0.84            |
| MITF <sup>low</sup> PTEN <sup>neg</sup>  | 1.76 (0.89, 3.51)  | 0.11            |
| Stage                                    |                    |                 |
| II                                       | 1                  | -               |
| III                                      | 1.89 (0.26, 13.95) | 0.53            |
| IV                                       | 7.29 (0.99, 53.73) | 0.05            |

Table S2. Genes and log2 expression value included in the centroid.

| Genes down in<br>MITF <sup>low</sup> /PTEN <sup>neg</sup> | Value (log2 Expression) | Genes up in MITF <sup>low</sup> /PTEN <sup>neg</sup> | Value (log2 Expression) |
|-----------------------------------------------------------|-------------------------|------------------------------------------------------|-------------------------|
| ITGB7                                                     | -0.6637874              | CADM1                                                | 1.646150435             |
| CD79A                                                     | -1.1278003              | DACT3                                                | 1.284409212             |
| TRIB1                                                     | -0.627541               | SLIT2                                                | 1.069307448             |
| CXCL10                                                    | -0.9425556              | PCDH18                                               | 1.272287668             |
| HLA-C                                                     | -0.6630066              | DIAPH3                                               | 1.049453117             |
| PLEK                                                      | -0.8497991              | C5orf13                                              | 1.463647947             |
| SDCBP                                                     | -0.6168393              | EFNB2                                                | 1.037998007             |
| VNN2                                                      | -0.7245285              | LOC730994                                            | 0.816222521             |
| CSTB                                                      | -0.6004923              | HOXB5                                                | 0.890360545             |
| CD8A                                                      | -0.9936763              | MOXD1                                                | 1.464179261             |
| ANKRD22                                                   | -0.6451211              | PCDH17                                               | 0.945373709             |
| CD52                                                      | -1.1162775              | PHLDB2                                               | 0.937604318             |
| NCF1                                                      | -0.6778936              | CDH2                                                 | 1.690163862             |
| BHLHB3                                                    | -0.748998               | DDAH1                                                | 0.904631728             |
| HSD17B14                                                  | -0.6270172              | POSTN                                                | 1.497294478             |
| PARP10                                                    | -0.590338               | ID3                                                  | 1.086589022             |
| BACE2                                                     | -0.7382248              | FAM46A                                               | 0.87567871              |
| IRF8                                                      | -0.9998088              | SBK1                                                 | 1.009141014             |
| GMPR                                                      | -0.7436598              | UBE2E3                                               | 0.702786405             |
| UPP1                                                      | -0.6648916              | ERRFI1                                               | 1.163913307             |
| BIRC3                                                     | -0.9908605              | NTM                                                  | 1.054703811             |
| PTPLA                                                     | -0.7938529              | PMEPA1                                               | 1.072653617             |
| SOX13                                                     | -0.5899106              | ANGPT1                                               | 1.237634849             |
| ROPN1B                                                    | -0.8454191              | PCOLCE                                               | 1.201493612             |
| TBC1D7                                                    | -0.7636963              | FZD1                                                 | 0.747943092             |
| CCL5                                                      | -0.9803421              | PFTK1                                                | 0.727311372             |
| SNCA                                                      | -0.8087163              | SPRY2                                                | 0.991593274             |
| BCL2A1                                                    | -0.6826054              | CDK6                                                 | 0.99478154              |
| SLC11A2                                                   | -0.6300387              | VCAN                                                 | 1.210859619             |
| NAPSB                                                     | -1.0304074              | DPYSL3                                               | 0.992375697             |
| MAZ                                                       | -0.5829541              | H19                                                  | 1.385217542             |
| ISG20                                                     | -1.0010139              | TUSC3                                                | 1.081069528             |
| FBXW5                                                     | -0.6088084              | EDNRA                                                | 0.748145714             |
| TAPBP                                                     | -0.6346449              | FZD2                                                 | 0.640606599             |
| RAB32                                                     | -0.6490322              | LMNB2                                                | 0.699635474             |
| INPP4B                                                    | -0.723364               | FLJ21986                                             | 0.98835468              |
| SWAP70                                                    | -0.6226537              | ANTXR1                                               | 0.773896172             |
| MICAL1                                                    | -0.6903372              | LOC100132901                                         | 0.628405303             |
| PHF15                                                     | -0.6475682              | PXDN                                                 | 1.09475001              |
| BIRC7                                                     | -0.9480172              | MLLT11                                               | 1.107994167             |
| UBE2L6                                                    | -0.6231672              | S1PR3                                                | 0.701131508             |
| RARRES3                                                   | -0.9509742              | ATP2B1                                               | 0.690079064             |
| LYN                                                       | -0.7620077              | CLIP3                                                | 0.842692443             |
| HCG4                                                      | -0.7113144              | RBBP4                                                | 0.641617936             |
| GSDMD                                                     | -0.6139003              | SPON1                                                | 1.228882684             |
| RAC2                                                      | -0.9906747              | CBX2                                                 | 0.809775067             |
| SLC9A3R1                                                  | -0.6598906              | HOXA5                                                | 0.87906882              |
| RUNX3                                                     | -0.9927214              | LPHN2                                                | 0.959883606             |
| FAM69A                                                    | -0.6461069              | DKK3                                                 | 0.96728898              |
| FCRLA                                                     | -1.2602482              | LOC100134134                                         | 1.132476535             |
| ST3GAL6                                                   | -0.726269               | IGFBP2                                               | 1.175978716             |
| IRF1                                                      | -0.855961               | LOX                                                  | 0.884465254             |

|           |            |              |             |
|-----------|------------|--------------|-------------|
| ECHDC3    | -0.6181085 | FOXC1        | 0.816302065 |
| CD38      | -0.7704543 | PAM          | 0.799031548 |
| SIGIRR    | -0.5547153 | LIMCH1       | 1.012433761 |
| ROPN1     | -0.9194562 | CPXM1        | 0.789543917 |
| FYB       | -0.9039163 | ZNF286C      | 0.591466564 |
| SNX10     | -0.6588212 | LOC730525    | 0.964789048 |
| HCST      | -0.9173861 | LAMB1        | 0.836327667 |
| HERC5     | -0.8169465 | KLF12        | 0.635473272 |
| OAS2      | -0.9269088 | LOC730101    | 0.552153478 |
| MCOLN2    | -0.7311837 | BCAT1        | 0.86543584  |
| APOE      | -0.8097618 | UBA52        | 0.71648786  |
| IFIH1     | -0.6855511 | ZNF84        | 0.57808192  |
| SAT1      | -0.5598643 | LOC100131139 | 0.746655149 |
| RAB38     | -1.0610584 | TSPAN5       | 0.759215173 |
| CD79B     | -1.0782803 | TMTC4        | 0.660299277 |
| SOD2      | -0.7568718 | TCF12        | 0.670699942 |
| GNPTAB    | -0.5581993 | AUTS2        | 0.785922266 |
| PSMB9     | -0.7884907 | ID1          | 0.782572387 |
| TMEM140   | -0.7171343 | TRIL         | 1.002751536 |
| GZMB      | -1.1113204 | KDM5B        | 0.592819139 |
| HPS1      | -0.5510096 | OLFML2A      | 0.657865462 |
| RPS6KA5   | -0.5670544 | LOC653344    | 0.557543286 |
| MFSD6     | -0.654256  | LRP5         | 0.677173513 |
| PRKCB1    | -1.0735466 | EFEMP2       | 0.795275881 |
| QPCT      | -1.3166014 | ZNF512       | 0.539659589 |
| IFI27     | -1.2217255 | EXTL2        | 0.626539861 |
| RGS10     | -0.7862767 | KDEL1        | 0.58089505  |
| GSTO1     | -0.6408478 | GPC6         | 0.539021279 |
| CXCL9     | -1.2573445 | TRO          | 0.739533058 |
| NKG7      | -1.0087833 | TMEM47       | 0.877205827 |
| PLXNC1    | -0.7586767 | LOC100133760 | 0.610353211 |
| RAB27A    | -0.7035185 | RBP1         | 0.904180363 |
| KAT2B     | -0.7054284 | RCAN2        | 0.815825294 |
| SLC45A2   | -1.3923654 | ZNF395       | 0.466799304 |
| ADAMDEC1  | -1.2114369 | COL8A1       | 1.104412183 |
| HIGD1A    | -0.5175034 | LOC645166    | 0.708179748 |
| IL18BP    | -0.9325305 | TLE4         | 0.855509022 |
| GPNMB     | -0.8294207 | RGS4         | 0.808223983 |
| PHACTR1   | -0.89301   | ENC1         | 0.70166635  |
| CD3D      | -1.3203313 | SOX4         | 0.746289566 |
| FAM65B    | -0.9658844 | PEG10        | 0.912269898 |
| GBP5      | -0.977453  | LAMC1        | 0.640956415 |
| PARP9     | -0.6920852 | PKIA         | 0.800216308 |
| HLA-B     | -1.035889  | CNPY4        | 0.526343004 |
| LOC390557 | -0.711938  | CENPV        | 0.637370896 |
| CD48      | -1.3089793 | LOC728732    | 0.588492945 |
| HCP5      | -1.1201781 | SSFA2        | 0.591275715 |
| HLA-F     | -0.9897719 | FSCN1        | 0.845168008 |
| TRIM63    | -1.0193057 | MEIS2        | 0.698440229 |
| PLA1A     | -1.3654242 | TCF3         | 0.511660304 |
| TYSND1    | -0.5696128 | SOCS2        | 0.711013533 |
| CXCL13    | -1.3775115 | ZNF532       | 0.661004424 |
| MGC13057  | -0.8628089 | NR4A2        | 0.792124417 |
| CABLES1   | -0.9646213 | SKP2         | 0.550286352 |
| MCOLN3    | -1.1803748 | STK32B       | 0.771656854 |
| HRK       | -0.9979237 | COL16A1      | 0.57506291  |

|            |            |           |             |
|------------|------------|-----------|-------------|
| OSTM1      | -0.7563323 | TMSB15A   | 0.974167792 |
| ASB9       | -0.7821446 | SALL2     | 0.523090784 |
| FAIM3      | -1.2771405 | SYT11     | 0.685722901 |
| VAT1       | -0.8184453 | SMA4      | 0.490970275 |
| ARL6IP5    | -0.5472999 | COL5A1    | 0.915868645 |
| S100A1     | -1.2352086 | ITGB5     | 0.759491207 |
| GYG2       | -1.1467153 | ESM1      | 0.802307819 |
| LY96       | -0.8734827 | ENAH      | 0.536317296 |
| CD44       | -0.8390348 | COL12A1   | 0.736125394 |
| HLA-E      | -0.8544589 | LOC645385 | 0.519091808 |
| FBXO6      | -0.7278542 | PRDM8     | 0.58278025  |
| HLA-G      | -0.9261851 | EMILIN1   | 0.681825454 |
| MITF       | -1.0316963 | PRICKLE1  | 0.673123973 |
| RTP4       | -0.7450338 | COL5A2    | 0.880003949 |
| SERPINB1   | -0.765538  | CPE       | 0.766764884 |
| CBR3       | -0.7069554 | SDC2      | 0.812521025 |
| ST6GALNAC2 | -1.0839479 | HNRPA1L-2 | 0.564260655 |
| MYO5A      | -0.8894011 | PRICKLE2  | 0.62877922  |
| PSMB8      | -0.8434825 | SPRY1     | 0.757695396 |
| PRKCD      | -0.7213112 |           |             |
| CEACAM1    | -1.3066298 |           |             |
| IRF4       | -1.0175048 |           |             |
| IFI35      | -0.8226885 |           |             |
| STX7       | -0.7898291 |           |             |
| TRPV2      | -0.9233402 |           |             |
| CHCHD6     | -1.3239017 |           |             |
| CASP1      | -1.1742113 |           |             |
| STAT1      | -1.0606008 |           |             |
| P2RX7      | -0.9106965 |           |             |
| LYST       | -1.1111641 |           |             |
| CAPN3      | -1.5022855 |           |             |
| MBP        | -1.1579674 |           |             |
| PIR        | -1.1636714 |           |             |
| TAP1       | -1.0964007 |           |             |
| LGALS3     | -1.1585214 |           |             |
| TNFRSF14   | -1.0275618 |           |             |
| WARS       | -1.182983  |           |             |
| GPR56      | -1.3043394 |           |             |
| UBD        | -1.6572527 |           |             |
| RENBP      | -1.1237332 |           |             |
| D4S234E    | -2.0144985 |           |             |
| TYR        | -2.3769119 |           |             |
| SILV       | -2.8824723 |           |             |
| MLANA      | -2.3966163 |           |             |

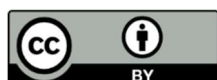

© 2020 by the authors. Licensee MDPI, Basel, Switzerland. This article is an open access article distributed under the terms and conditions of the Creative Commons Attribution (CC BY) license (<http://creativecommons.org/licenses/by/4.0/>).
